# Supplementary material
Source: publisher figshare collection journal article supplement (https://frontiersin.figshare.com/ndownloader/files/16788713)
Supplement: Supplementary file [file 16788713]

### Supplementary Figure

Scatter plot visualizing the heart rate. A regression line for the formula  $\text{heart rate} \sim \text{age}$  for both men and women was added with corresponding 95% confidence intervals (gray zones).

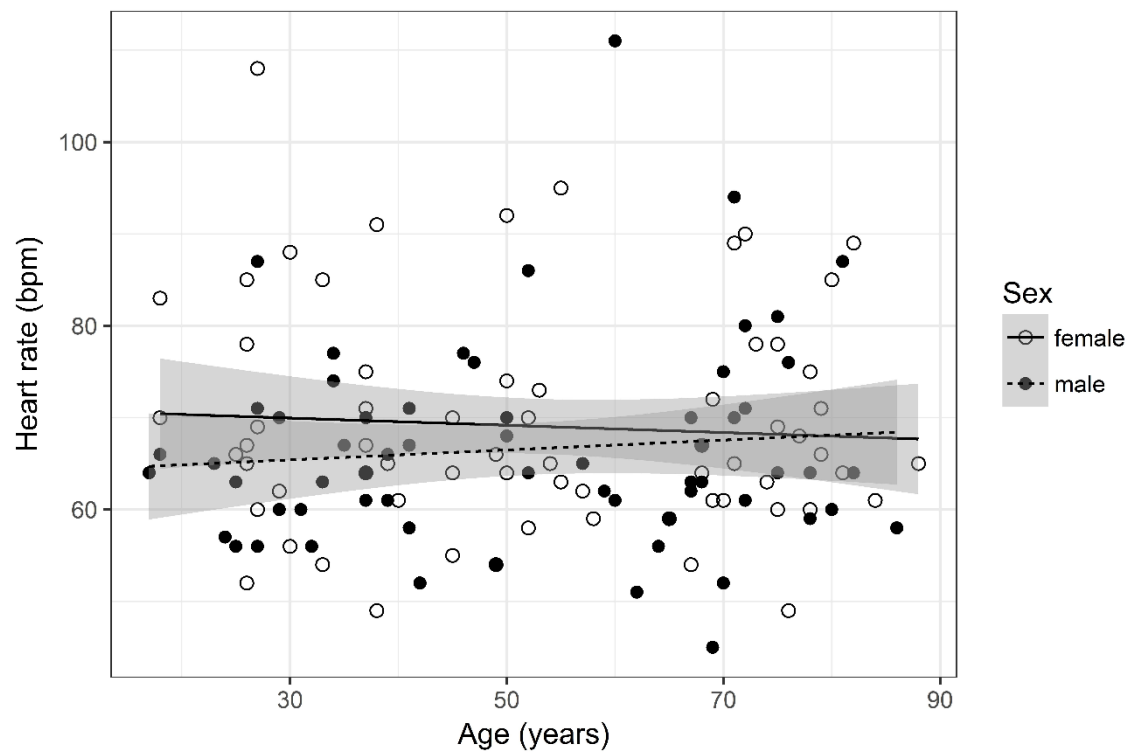

### Supplementary Table

*Sequence parameters of the sagittal 3D T2w TSE DRIVE sequence.*

| Parameters                      | 3D T2w TSE DRIVE sequence      |
|---------------------------------|--------------------------------|
| Field of View (FoV)             | 180 x 180mm <sup>2</sup>       |
| Acquired voxel size             | 0.6 x 0.6 x 0.6mm <sup>3</sup> |
| Reconstructed voxel size        | 0.3 x 0.3 x 0.3mm <sup>3</sup> |
| Number of slices                | 83                             |
| Repetition time (TR)            | 1500ms                         |
| Echo time (TE)                  | 148ms                          |
| TSE Factor                      | 45                             |
| SENSE factor                    | 2                              |
| Number of signal averages (NSA) | 1                              |
| Receiver bandwidth              | 381 Hz/pixel                   |
| Acquisition time [mm:ss]        | 05:39                          |

*Additionally as part of the supplementary material, a full statistical report (Data Sheet 3) and the raw data (large excel file, Data Sheet 1) of the CSF flow dynamics parameters is given.*
